# Supplementary material for: A mechanism for the variation in the photoelectric performance of a photodetector based on CVD-grown 2D MoS2
Source: Royal Society of Chemistry journal article supplement (doi:10.1039/d0ra10302k), 2021-01-01
Supplement: d0ra10302k1.pdf [file d0ra10302k1.pdf]

## Supporting Information

### Mechanism for the Variation in the Photoelectric performance of the Photodetector based on the CVD-Grown 2D MoS<sub>2</sub>

Jiaying Jian <sup>a,b,c\*</sup>, Honglong Chang <sup>a\*</sup>, Pengfan Dong <sup>c</sup>, Zewen Bai <sup>c</sup>, Kangnian Zuo <sup>c</sup>

<sup>a</sup> School of Mechanical Engineering, Northwestern Polytechnical University, Baoding 710072, P.R. China, E-mail: [changhl@nwpu.edu.cn](mailto:changhl@nwpu.edu.cn), [jianjiaying@nwpu.edu.cn](mailto:jianjiaying@nwpu.edu.cn)

<sup>b</sup> School of Electronic Information and Engineering, Xi'an Technological University, Xi'an 710021, P.R. China, E-mail: [jianjiaying@xatu.edu.cn](mailto:jianjiaying@xatu.edu.cn)

<sup>c</sup> Shaanxi key Laboratory of Photoelectric Functional Materials and Devices, Xi'an Technological University, Xi'an 710021, P.R. China.

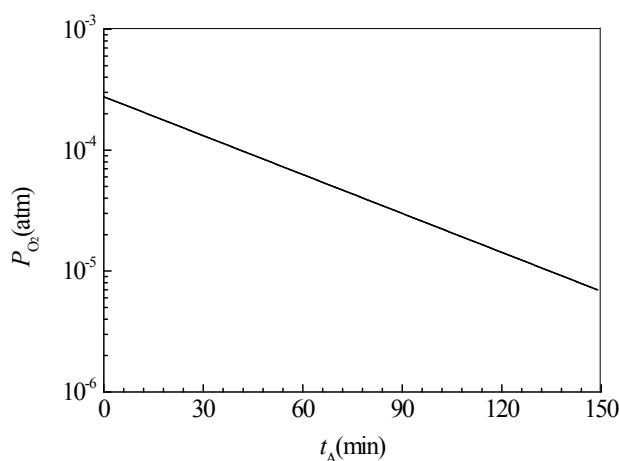

Figure S1. Dependence of the partial pressures of oxygen on the subsequent aeration time since the moment when the inert gas has been injected to 1 atm.

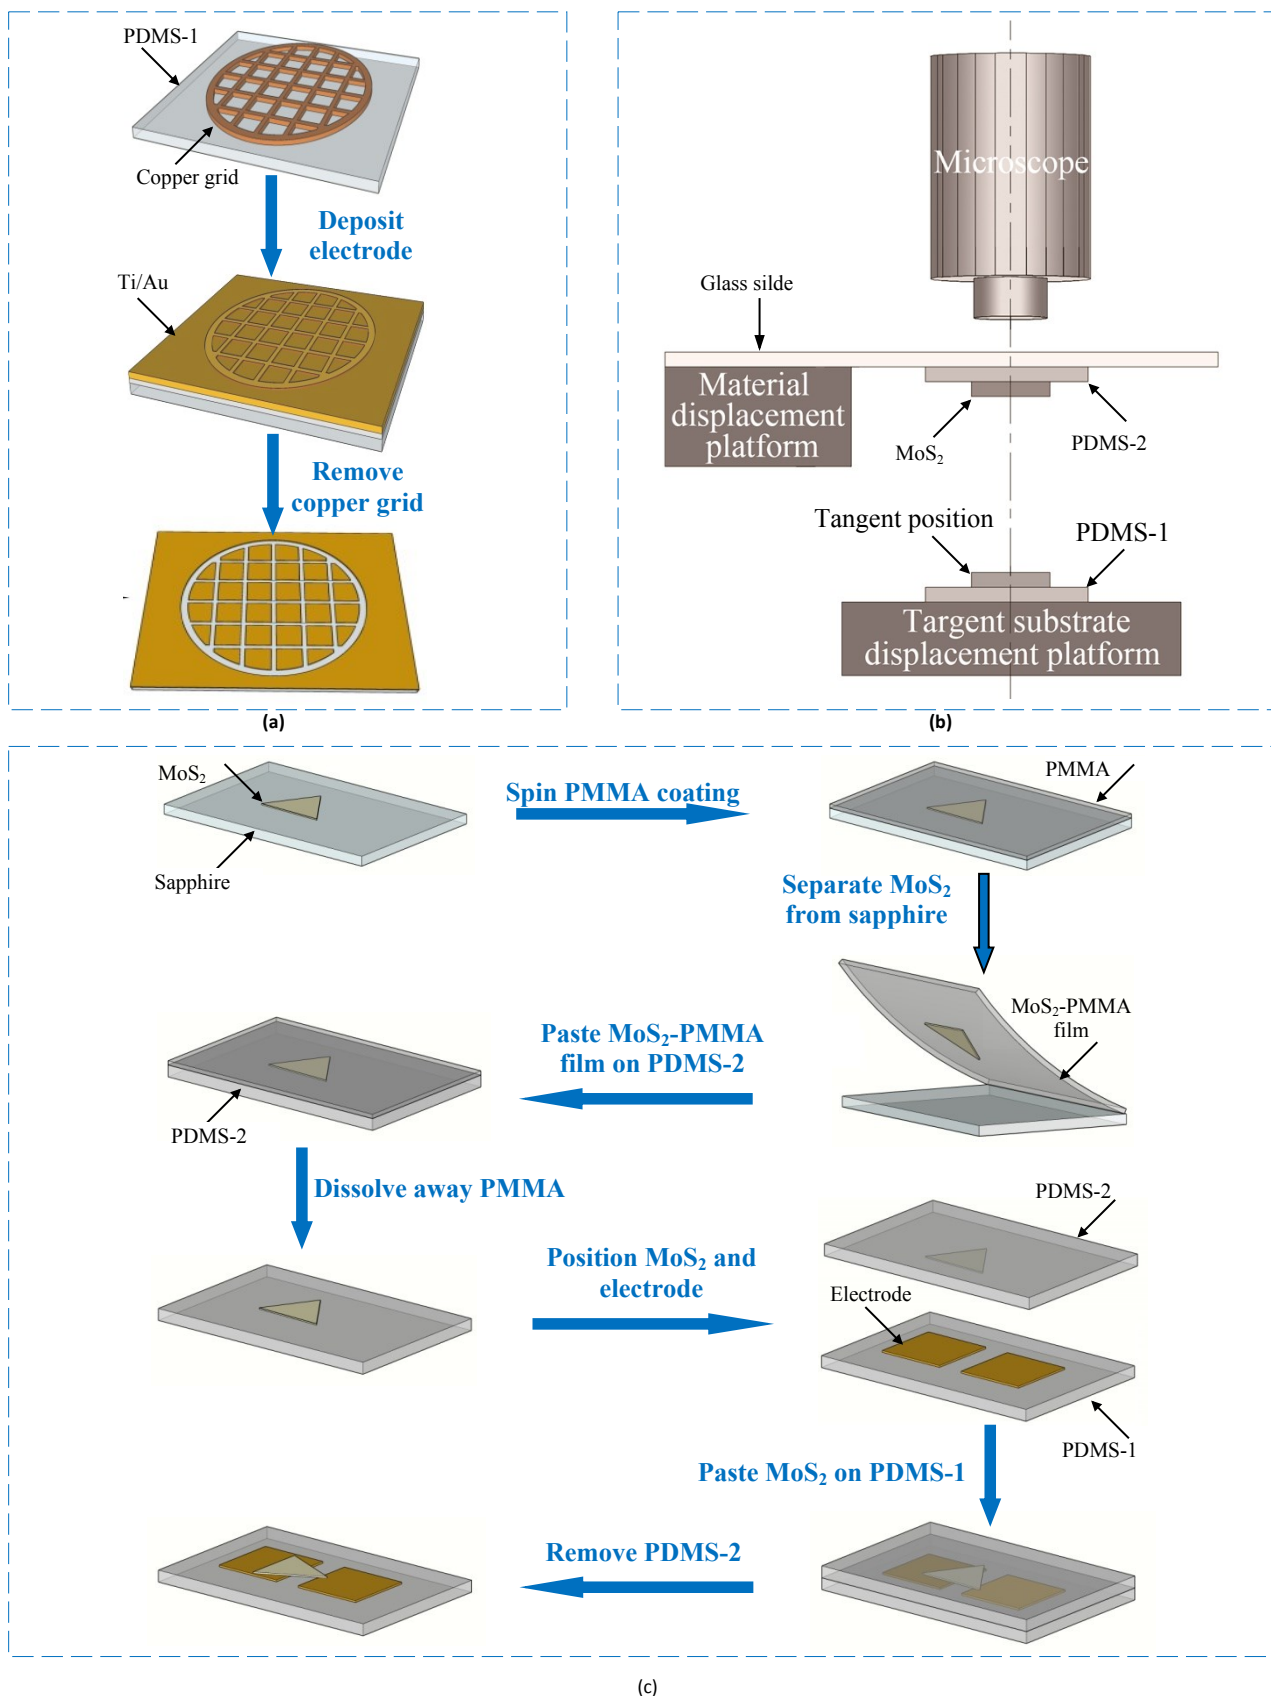

Figure S2. Operating procedures for preparation of metal electrodes on PDMS flexible substrate and transferring MoS<sub>2</sub> onto the flexible substrate under precise position control. a) Preparation of metal electrodes on PDMS flexible substrate. b) Schematic diagram for transfer of MoS<sub>2</sub> onto a flexible substrate under precise position control. c) Transfer of MoS<sub>2</sub> onto the flexible substrate.
